# Supplementary material for: Coagulation, Inflammation, and Vascular Tone: identifying axes of endothelial dysfunction in Young Women with Normal Weight Obesity
Source: Research Square preprint supplement (doi:10.21203/rs.3.rs-8673087/v1), 2026-01-29
Supplement: Supplementary file 1 [file 1129b0f3957096aeae195f06.docx]

**Table S1. Anthropometric characteristics of the subjects.**

|  | **All**  **(n = 176)** | | **NW**  **(n = 88)** | | **NWO**  **(n = 88)** | | P-value |
| --- | --- | --- | --- | --- | --- | --- | --- |
| **median** | Q25–Q75 | **median** | Q25–Q75 | **median** | Q25–Q75 |
| Age [years] | **20** | 19 – 22 | **20** | 19 – 22 | **20** | 19 – 22 | 0.500 |
| Weight [kg] | **60** | 55 – 65 | **58** | 54 – 63 | **62** | 57 – 67 | p < 0.0001 |
| Height [cm] | **168** | 163 – 172 | **169** | 164 – 173 | **167** | 163 – 172 | 0.132 |
| BMI [kg/m2] | **21.4** | 20.2 – 23.1 | **20.4** | 19.5 – 21.7 | **22.7** | 21.3 – 23.7 | p < 0.0001 |
| PBF [%] | **35.2** | 32.1 – 38 | **32.1** | 29.5 – 33.4 | **37.9** | 36.7 – 39.4 | p < 0.0001 |
| WC [cm] | **70** | 67 – 74 | **69** | 66 – 73 | **73** | 69 – 75 | p < 0.0001 |
| HC [cm] | **97** | 91 – 100 | **94** | 90 – 97 | **99** | 96 – 103 | p < 0.0001 |
| WHR | **0.7** | 0.70 – 0.76 | **0.7** | 0.71 – 0.76 | **0.7** | 0.69 – 0.76 | 0.550 |
| WHtR | **42** | 40 – 44 | **41** | 39 – 43 | **43** | 41 – 45 | p < 0.0001 |

**Legend:** BMI – body mass index; WC – waist circumference; HC – hip circumference; WHR – waist to hip ratio; WHtR – waist to height ratio

**Table S2. Body composition characteristics of the subjects.**

|  | **All**  **(n = 176)** | | **NW**  **(n = 88)** | | **NWO**  **(n = 88)** | | P-value |
| --- | --- | --- | --- | --- | --- | --- | --- |
| **median** | Q25–Q75 | **median** | Q25–Q75 | median | Q25–Q75 |
| FM [kg] | **21.7** | 18.5 – 24.9 | **18.4** | 16.7 – 20.6 | **24.7** | 22.6 – 26.3 | p < 0.0001 |
| FMI [kg/m2] | **7.8** | 6.6 – 8.9 | **6.6** | 6.1 – 7.1 | **8.7** | 8.4 – 9.4 | p < 0.0001 |
| AFM [kg] | **12** | 10.2 – 13.5 | **10.3** | 9.2 – 11.4 | **13.3** | 12.2 – 14.4 | p < 0.0001 |
| AFMI [kg/m2] | **4.3** | 3.7 – 4.8 | **3.7** | 3.3 – 4 | **4.8** | 4.4 – 5.1 | p < 0.0001 |
| TAR | **0.73** | 0.66 – 0.79 | **0.7** | 0.65 – 0.78 | **0.74** | 0.68 – 0.81 | 0.051 |
| FMR | **0.74** | 0.69 – 0.79 | **0.71** | 0.67 – 0.76 | **0.76** | 0.71 – 0.80 | p < 0.0001 |
| APF [%] | **30.8** | 27.5 – 35.6 | **27.6** | 23.8 – 30.1 | **35.6** | 32.7 – 38.1 | p < 0.0001 |
| GPF [%] | **40.6** | 37.8 – 42.9 | **37.7** | 35.1 – 39.3 | **42.9** | 41.6 – 44.5 | p < 0.0001 |
| A/G | **0.77** | 0.71 – 0.83 | **0.73** | 0.67 – 0.79 | **0.82** | 0.76 – 0.88 | p < 0.0001 |
| VFA [cm2] | **45.2** | 36.1 – 56.4 | **39** | 33.7 – 48.5 | **51.8** | 42.3 – 63.2 | p < 0.0001 |
| VFM [g] | **217.9** | 174 – 271.8 | **187.8** | 162.4 – 233.7 | **249.7** | 203.8 – 304.5 | p < 0.0001 |
| VFV [cm3] | **235.6** | 188.1 – 293.8 | **203.1** | 175.5 – 252.7 | **270** | 220.3 – 329.2 | p < 0.0001 |
| FFM [kg] | **37.9** | 35.7 – 41.3 | **38.8** | 36.4 – 41.7 | **37.3** | 35.3 – 40.6 | 0.084 |
| FFMI [kg/m2] | **13.6** | 13 – 14.3 | **13.9** | 12.9 – 14.4 | **13.5** | 13 – 14.2 | 0.374 |
| AFFM [kg] | **16.4** | 14.9 – 17.7 | **16.7** | 15.5 – 18.3 | **16.1** | 14.5 – 17.5 | 0.042 |
| AFFMI [kg/m2] | **5.8** | 5.5 – 6.2 | **5.9** | 5.6 – 6.3 | **5.8** | 5.5 – 6.1 | 0.082 |
| TLM [kg] | **40.3** | 37.7 – 43.5 | **41** | 38.54 – 44.1 | **39.5** | 37.5 – 43.2 | 0.073 |
| TLMI [kg/m2] | **14.4** | 13.8 – 15.1 | **14.6** | 13.8 – 15.2 | **14.3** | 13.8 – 15 | 0.271 |
| ALM [kg] | **17.5** | 15.9 – 18.9 | **17.9** | 16.5 – 19.5 | **17.2** | 15.6 – 18.7 | 0.038 |
| ALMI [kg/m2] | **6.2** | 5.9 – 6.6 | **6.3** | 6 – 6.7 | **6.2** | 5.8 – 6.5 | 0.059 |

**Legend:** FM – fat mass; FMI – fat mass index; AFM – appendicular fat mass; AFMI – appendicular fat mass ratio;
TAR - trunk-to-appendicular fat ratio; FMR – fat mass ratio; APF – android percent fat; GPF – gynoid percent fat;
A/G – android percent fat to gynoid percent fat ratio; VFA – visceral fat area; VFM - visceral fat mass; VFV - visceral fat volume; FFM – fat-free mass; FFMI – fat-free mass index; AFFM – appendicular fat-free mass; AFFMI - appendicular fat-free mass index; TLM – total lean mass; TLMI – total lean mass index; ALM – appendicular lean mass; ALMI - appendicular lean mass index


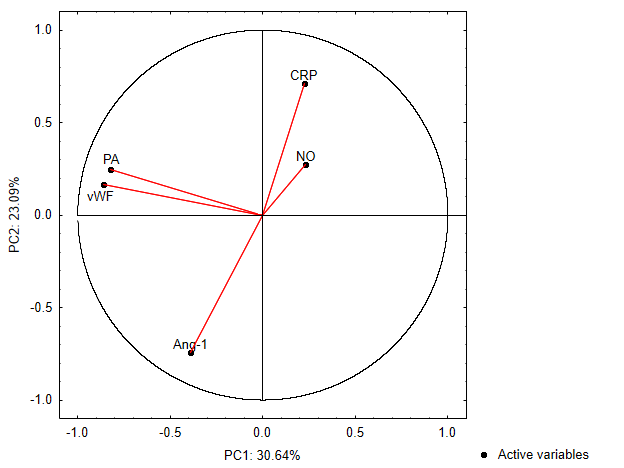


**Figure S1.** Projection of active variables onto the space of two principal components (PC1 and PC2).
